# Supplementary material for: Harmine inhibits breast cancer cell migration and invasion by inducing the degradation of Twist1
Source: PubMed Central journal article supplement (PMC7904211; doi:10.1371/journal.pone.0247652), 2021-02-24
Supplement: pone.0247652.s002.pdf [file pone.0247652.s002.pdf]

## Fig 4A raw images

Fig 4A Twist1 blot

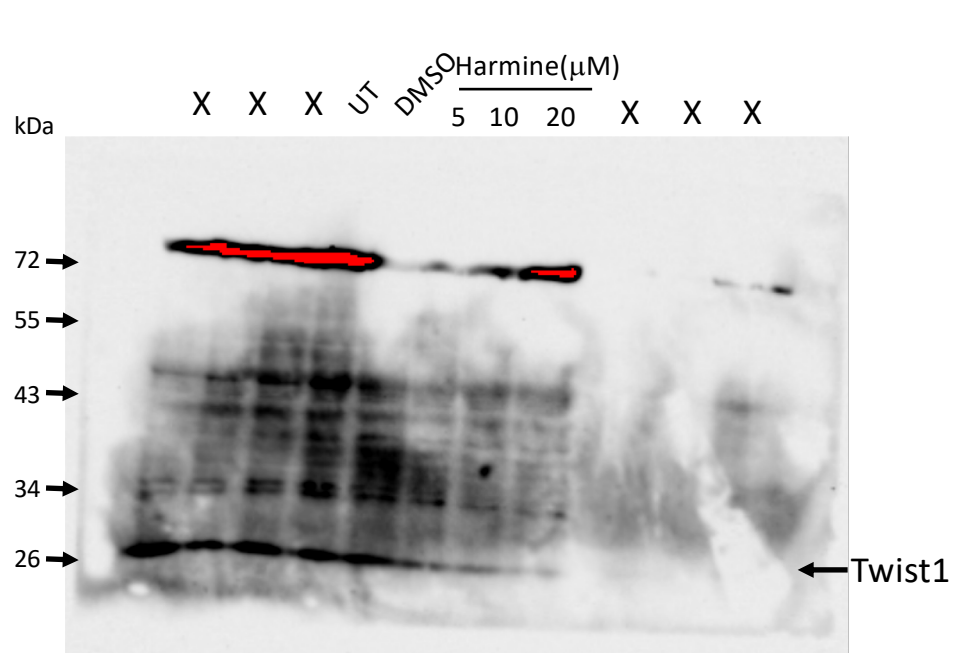

Fig 4A loading control blot

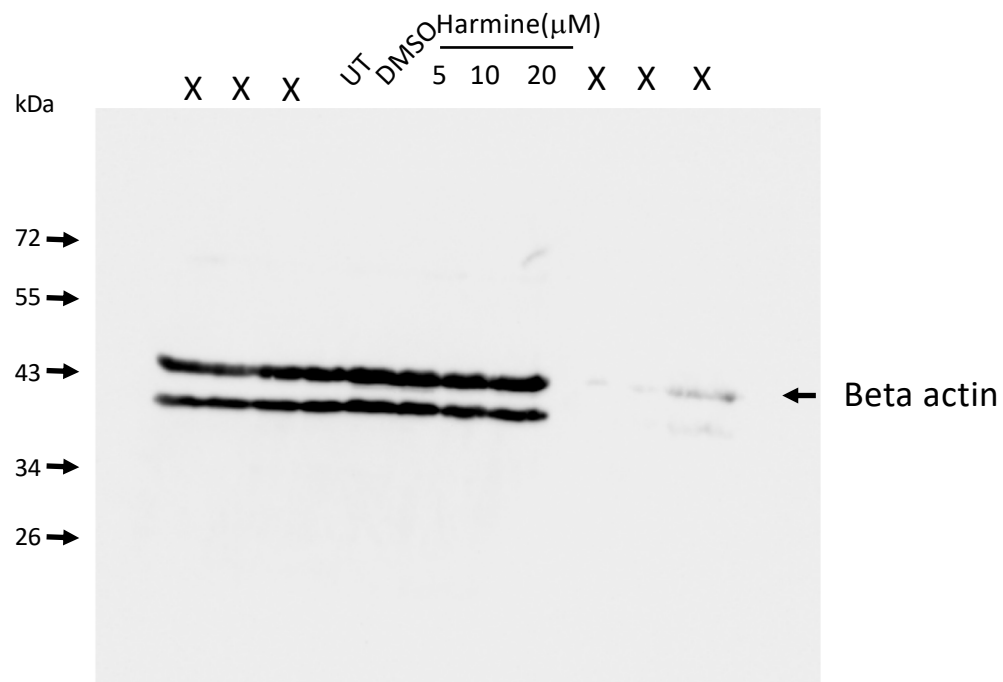

The images were captured with Bio-Rad ChemiDoc imager

**Fig4C raw images**

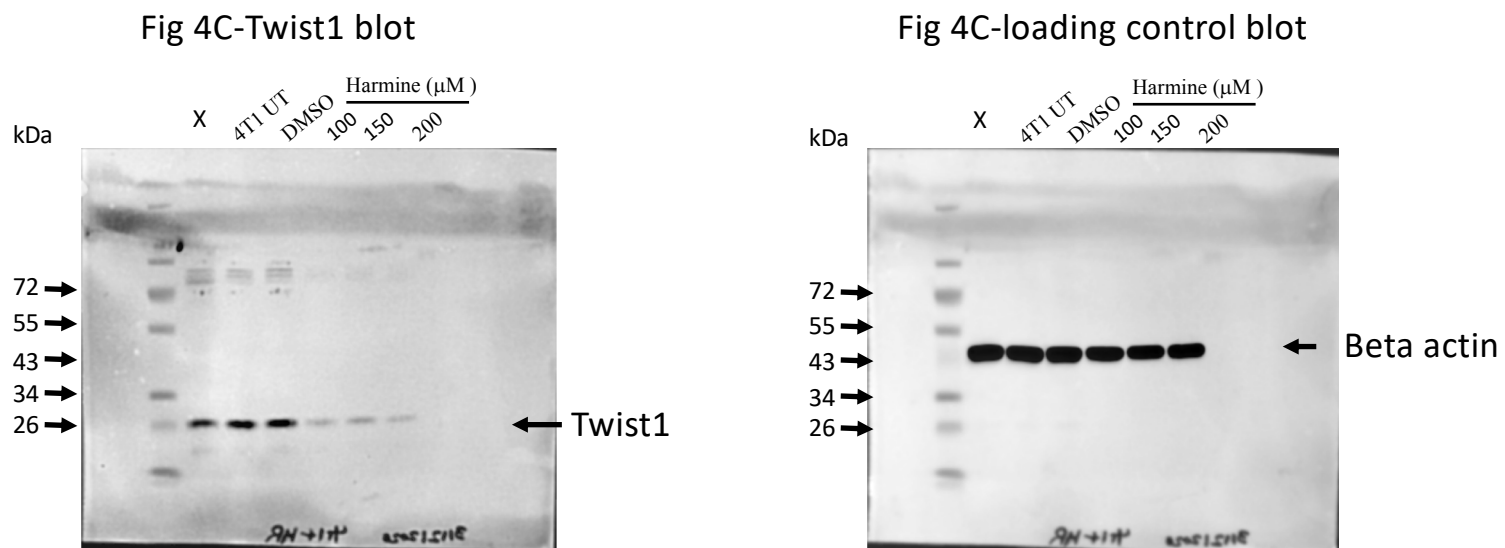

The images were captured with Bio-Rad ChemiDoc imager

## Fig 5A raw images

### Fig 5A Twist1 blot

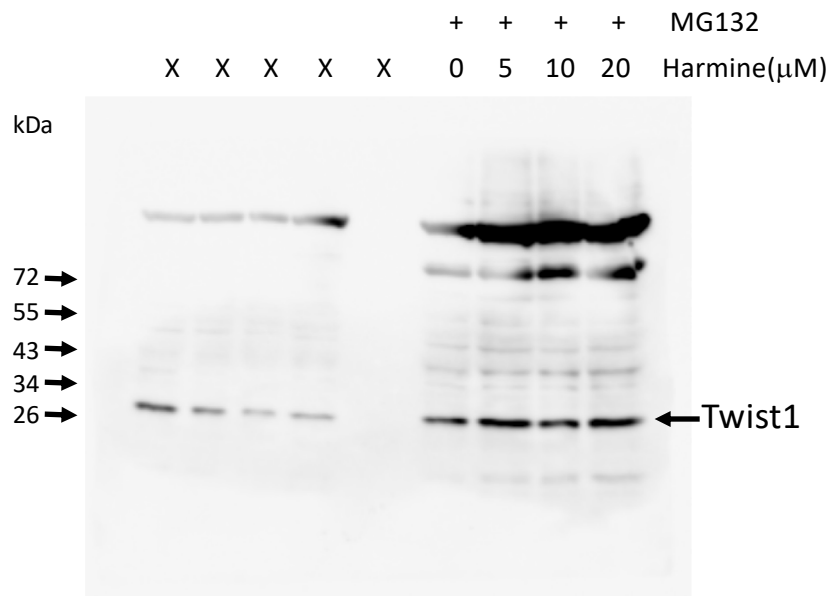

### Fig 5A loading control blot

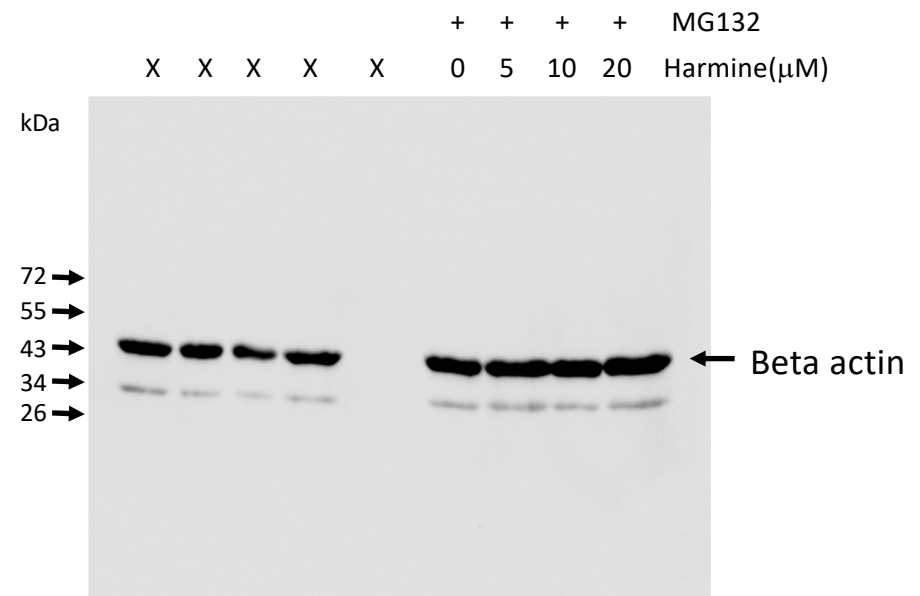

The images were captured with Bio-Rad ChemiDoc imager

**Fig 5C raw images**

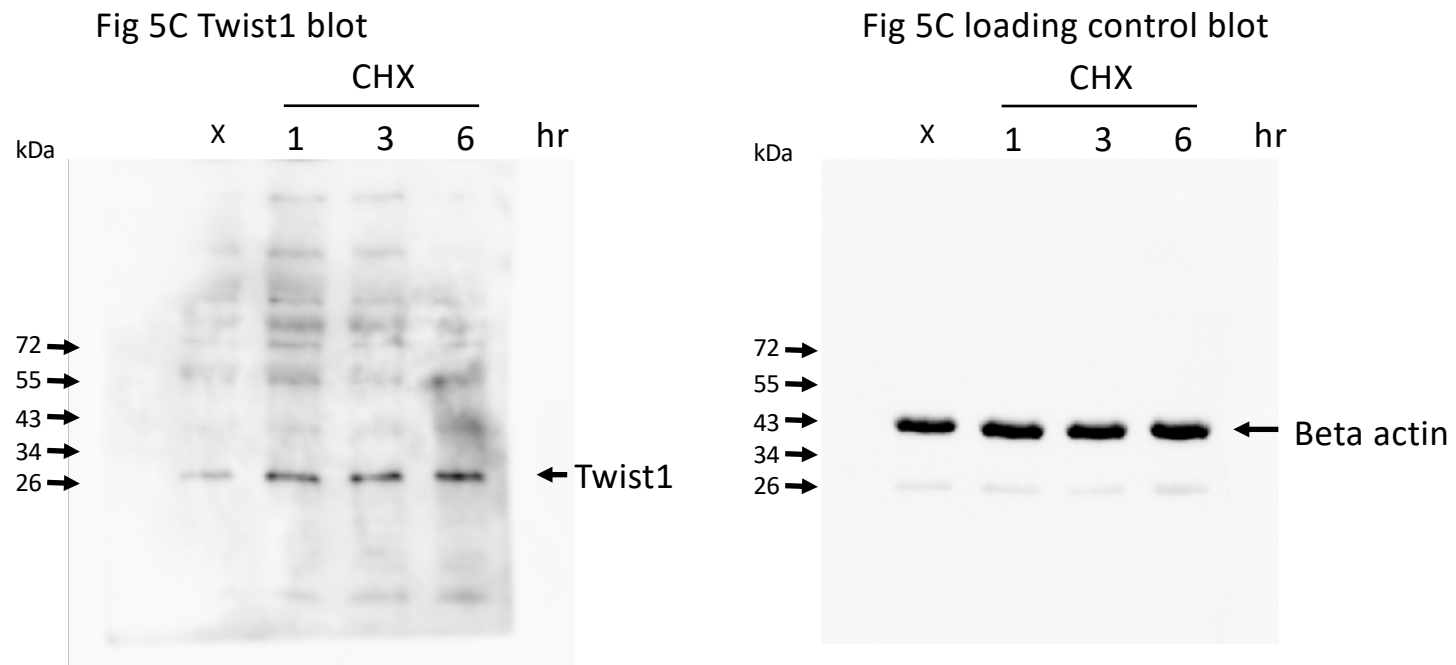

The images were captured with Bio-Rad ChemiDoc imager



**Fig 5G raw images**

Fig 5G Twist1 blot

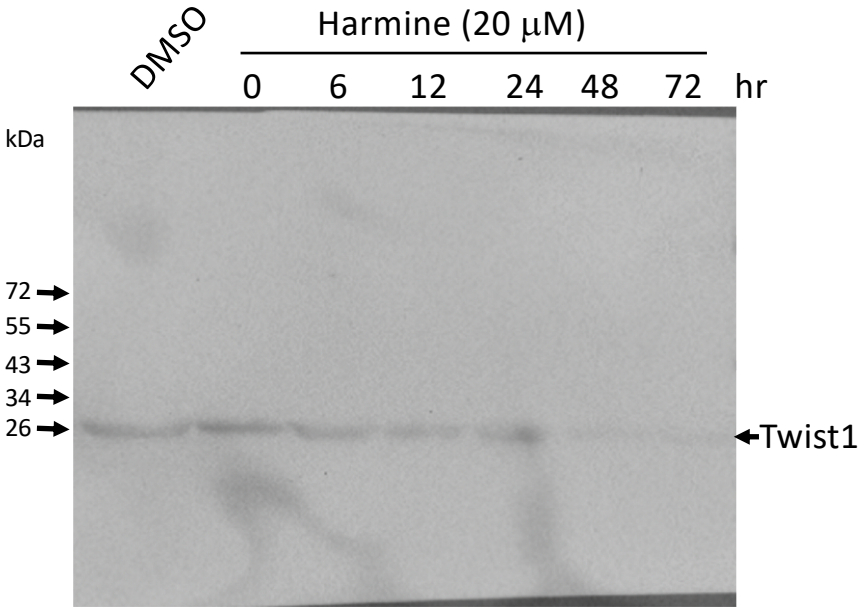

Fig 5G loading control blot

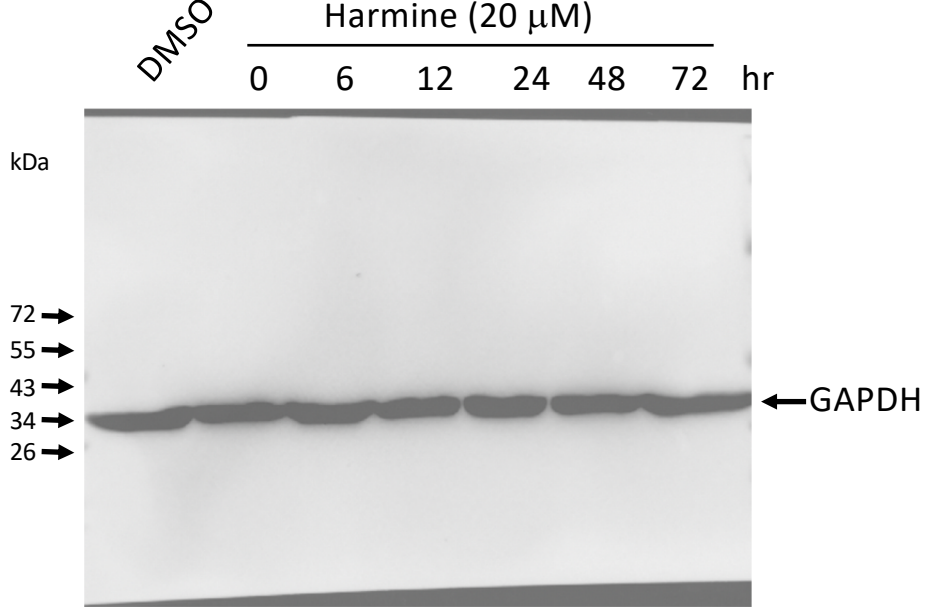

The images were captured with Bio-Rad ChemiDoc imager
